1     **A Test of the Pioneer Factor Hypothesis**

2     Jeffrey L Hansen<sup>1,2</sup>, Barak A Cohen<sup>1,2\*</sup>

3

4     **Affiliations**

5     <sup>1</sup>The Edison Family Center for Genome Sciences and Systems Biology, School of Medicine,  
6     Washington University in St. Louis, Saint Louis, MO, USA.

7     <sup>2</sup>Department of Genetics, School of Medicine, Washington University in St. Louis, Saint Louis,  
8     MO, USA.

9

10    \*Correspondence to: [cohen@wustl.edu](mailto:cohen@wustl.edu)

11

12

13

14

15

16

17

18

19

20

21

22

23

24

## 25 **Abstract**

26 The Pioneer Factor Hypothesis (PFH) states that pioneer factors (PFs) are a subclass of  
27 transcription factors (TFs) that bind to and open inaccessible sites and then recruit non-pioneer  
28 factors (nonPFs) that activate batteries of silent genes. We tested the PFH by expressing the  
29 endodermal PF FoxA1 and nonPF Hnf4a in K562 lymphoblast cells. While co-expression of  
30 FoxA1 and Hnf4a activated a burst of endoderm-specific gene expression, we found no  
31 evidence for functional distinction between these two TFs. When expressed independently, both  
32 TFs bound and opened inaccessible sites, activated endodermal genes, and “pioneered” for  
33 each other, although FoxA1 required fewer copies of its motif to bind at inaccessible sites. A  
34 subset of targets required both TFs, but the mode of action at these targets did not conform to  
35 the sequential activity predicted by the PFH. From these results we propose an alternative to  
36 the PFH where “pioneer activity” depends not on the existence of discrete TF subclasses, but  
37 on TF binding affinity and genomic context.

38

## 39 **Main**

40 Transcription factors (TFs) face steric hindrance when instances of their motifs are occluded by  
41 nucleosomes <sup>1,2</sup>. This barrier prevents spurious transcription but must be overcome during  
42 development when TFs activate batteries of silent genes. The PFH describes how TFs  
43 recognize and activate nucleosome-occluded targets. According to the PFH, specialized  
44 subclasses of TFs collaborate sequentially to activate their targets. Pioneer factors (PFs) bind to  
45 and open inaccessible sites and then recruit non-pioneer factors (nonPFs) that are responsible  
46 for recruiting additional factors to initiate gene expression <sup>3-6</sup>.

47

48 PFs also play a primary role in cellular reprogramming by first engaging silent regulatory sites of  
49 ectopic lineages <sup>7</sup>. Continuous overexpression of PFs and nonPFs can lead to a variety of

50 lineage conversions<sup>8-13</sup>. The conversion from embryonic fibroblasts to induced endoderm  
51 progenitors offers one clear example<sup>12,13</sup>. This reprogramming cocktail combines the canonical  
52 PF FoxA1<sup>6</sup> and nonPF Hnf4a<sup>14</sup> and is suggested to rely upon sequential PF and nonPF  
53 behavior<sup>15</sup>. We used this cocktail to test the PFH.

54  
55 The PFH makes strong predictions about the activities of ectopically expressed PFs and  
56 nonPFs. Because PFs are defined by their ability to bind nucleosome-occluded instances of  
57 their motifs, the PFH predicts that PFs should bind to a large fraction of their motifs. However,  
58 similar to other TFs, PFs only bind a limited subset of their inaccessible motifs<sup>16-19</sup>. There are  
59 chromatin states that are prohibitive to PF binding<sup>17,20</sup> and, in at least two cases, FoxA1 requires  
60 other TFs to bind its sites<sup>18,21</sup>. These examples suggest that PFs are not always sufficient to  
61 open inaccessible chromatin. The PFH also predicts that nonPFs should only bind at accessible  
62 sites, yet the bacterial protein LexA can pioneer inaccessible sites in mammalian cells<sup>22</sup>. These  
63 observations, and the absence of direct genome-wide interrogations of the PFH, prompted us to  
64 design experiments to test major predictions made by the PFH using FoxA1 and Hnf4a as a  
65 model PF and nonPF.

66  
67 To test these predictions, we expressed FoxA1 and Hnf4a separately and together in K562  
68 lymphoblast cells and then measured their effects on DNA-binding, chromatin accessibility, and  
69 gene activation. In contrast to the predictions of the PFH, we found that both FoxA1 and Hnf4a  
70 could independently bind to inaccessible instances of their motifs, induce chromatin  
71 accessibility, and activate endoderm-specific gene expression. The only notable distinction  
72 between the two factors was that Hnf4a required more copies of its motif to bind at inaccessible  
73 sites. When expressed together, co-binding could only be explained in a minority of cases by  
74 sequential FoxA1 and Hnf4a activity. Instead, most co-bound sites required concurrent co-

75 expression of both factors, which suggests cooperativity between these TFs at certain  
76 repressive genomic locations. We propose an alternative to the PFH that eliminates the  
77 distinction between PFs and nonPFs and instead posits that the energy required to pioneer  
78 occluded sites (“pioneer activity”) comes from the cumulative affinity of motifs and cooperativity  
79 between TFs.

80

## 81 **Results**

### 82 **Generation of FoxA1 and Hnf4a clonal lines**

83 We tested predictions of the PFH using FoxA1 as a model endoderm PF and Hnf4a as a model  
84 nonPF. Because PFs are defined by their behavior in ectopic settings, we expressed FoxA1 and  
85 Hnf4a in mesoderm derived K562 lymphoblast cells. These cells express neither FoxA1 nor  
86 Hnf4a and present an entirely new complement of chromatin and co-factors. Thus any ectopic  
87 signature that we observe is due primarily to the TFs themselves. We focused only on the initial  
88 response to TF expression to capture primary mechanisms of TF behavior and not the  
89 secondary effects that can lead to cellular conversion and that may confound our analyses.

90

91 To perform these experiments, we created lentiviruses that inducibly express either FoxA1 or  
92 Hnf4a (Fig. 1A). We created cassettes in which a doxycycline inducible promoter drives either  
93 FoxA1 or Hnf4a and cloned these cassettes separately into a lentiviral vector<sup>23</sup> that  
94 constitutively expresses Green Fluorescent Protein (GFP). Although PFs are typically  
95 expressed at supraphysiological levels<sup>24,25</sup>, we infected K562 cells with each vector at a  
96 multiplicity of infection (MOI) of one to limit the degree of non-specific effects. We then used  
97 flow cytometry to sort single cells and selected FoxA1 and Hnf4a clones that had similar GFP  
98 levels to ensure that our clones carried a similar transgene load. Finally, we performed both  
99 doxycycline titration induction and time course experiments to identify the minimum doxycycline

100 concentration and treatment time for robust TF activity. We observed that 0.5 µg/ml doxycycline  
101 for 24 hours was the minimal treatment condition that allowed *FoxA1* and *Hnf4a*, and their  
102 respective target genes *ALB* and *APOB*, to reach a plateau of expression (Supplementary Fig.  
103 1). We used these conditions in our subsequent experiments.

104

### 105 **Co-expression of FoxA1 and Hnf4a in K562 cells conforms to the predictions of the PFH**

106 The first prediction of the PFH is that co-expression of FoxA1 and Hnf4a should be sufficient to  
107 induce ectopic tissue-specific gene expression. We tested this prediction by infecting our FoxA1  
108 clonal line with Hnf4a-expressing lentivirus to generate a double expression clonal line,  
109 hereafter referred to as FoxA1-Hnf4a. Upon co-induction in K562 cells we observed strong  
110 enrichment for both liver- and intestine-specific gene activation; FoxA1-Hnf4a activated 91 liver-  
111 specific genes (18 expected,  $P < 10^{-38}$ , cumulative hypergeometric) and 38 intestinal genes (9  
112 expected by chance,  $P < 10^{-13}$ , cumulative hypergeometric) (Fig. 1B). The dual liver and intestine  
113 enrichment that we observed is consistent with the finding that intestinal gene regulatory  
114 networks appear during reprogramming experiments that aim to use FoxA1-Hnf4a to convert  
115 embryonic fibroblasts to the liver lineage<sup>13</sup>. We conclude that FoxA1 and Hnf4a are sufficient to  
116 activate endoderm-specific gene expression in the ectopic K562 line.

117

118 Where ectopic genes are activated in K562 cells, the PFH predicts co-binding of FoxA1 and  
119 Hnf4a at inaccessible sites and induction of chromatin accessibility. Alternatively, FoxA1 and  
120 Hnf4a may not be able to overcome the K562 chromatin environment and instead activate gene  
121 expression by binding exclusively to accessible K562 sites. To distinguish between these  
122 possibilities, we measured FoxA1 and Hnf4a binding by CUT&Tag<sup>26</sup> after induction, and  
123 chromatin accessibility by ATAC-seq<sup>27</sup> both before and after doxycycline induction. At the liver-  
124 specific locus *Albumin* (*ALB*), FoxA1 and Hnf4a co-bound at inaccessible sites and increased

125 accessibility (Fig. 1C). This pattern was consistent surrounding FoxA1-Hnf4a activated liver  
126 genes: 43 of the 53 co-bound sites within 50 kb of a FoxA1-Hnf4a activated gene were  
127 inaccessible prior to induction, and the average accessibility signal at these co-bound sites  
128 increased substantially upon induction (Fig. 1D).

129

130 Although we focused on functional binding surrounding activated liver genes, these patterns  
131 were consistent across the genome. The vast majority of both FoxA1 and Hnf4a binding sites  
132 fell within inaccessible regions (Supplementary Fig. 2) and both FoxA1 and Hnf4a opened the  
133 majority of the inaccessible sites to which they bound (Supplementary Fig. 2). These results  
134 show that despite an entirely ectopic complement of chromatin and co-factors within mesoderm  
135 derived K562 cells, the endodermal TFs FoxA1 and Hnf4a can find and activate the correct  
136 genes. Most individual binding by FoxA1 and Hnf4a near their co-activated genes occurred at  
137 the same sites bound in HepG2 liver cells<sup>28</sup> (Supplementary Fig. 2). Altogether we conclude that  
138 when co-expressed, FoxA1 and Hnf4a conform to the predictions of the PFH and that cis-  
139 regulatory sequences are sufficient to guide their activity within an ectopic cell type.

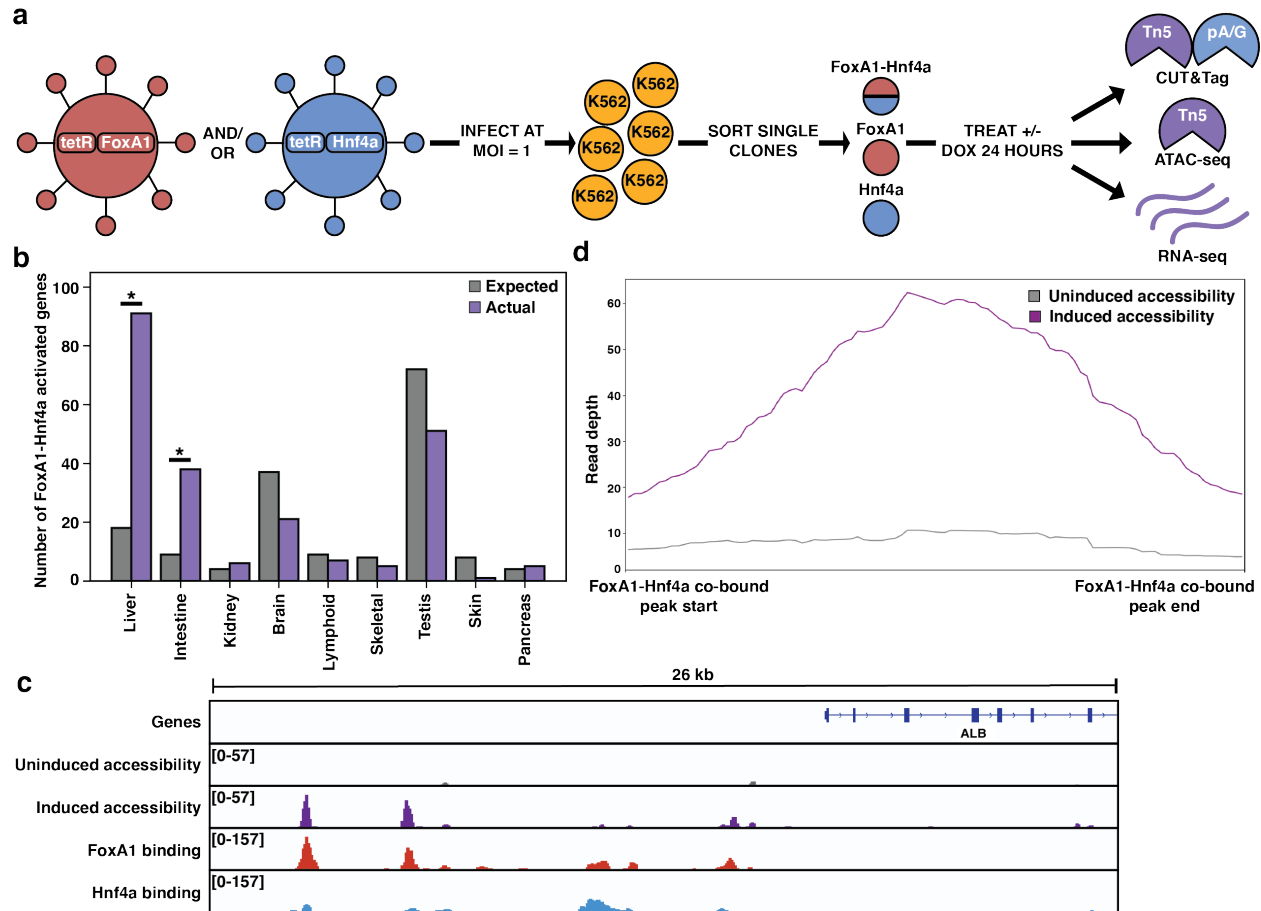

140

141 **Fig. 1: FoxA1-Hnf4a pioneers liver-specific loci in K562 cells. (a)** Schematic of experimental design to  
 142 infect K562 cells with FoxA1- or Hnf4a-lentivirus and then perform functional assays on dox-induced cells.  
 143 In CUT&Tag, a protein A-protein G fusion (pA/G) increases the binding spectrum for Fc-binding and  
 144 allows Tn5 recruitment to antibody-labeled TF binding sites. In ATAC-seq, Tn5 homes to any accessible  
 145 site. And in RNA-seq, polyA RNA is captured and sequenced. **(b)** The number of tissue-specific genes  
 146 predicted from the hypergeometric distribution to be activated by FoxA1-Hnf4a compared to the number  
 147 actually activated. Both liver- ( $P < 10^{-38}$ ) and intestinal-enrichment ( $P < 10^{-13}$ ) are significant. There are 242  
 148 total liver-enriched genes and 122 total intestine-enriched genes. **(c)** Genome browser view of a  
 149 representative liver-specific locus (*ALB*) in FoxA1-Hnf4a clonal line that shows uninduced and induced  
 150 accessibility, FoxA1 binding, and Hnf4a binding. **(d)** Meta plot showing uninduced and induced  
 151 accessibility at all FoxA1-Hnf4a co-bound sites within 50 kb of each FoxA1-Hnf4a activated liver-specific  
 152 gene ( $n = 53$ ).

153

154 **Both FoxA1 and Hnf4a individually activate many liver-specific genes**

155 We next sought to test whether ectopic tissue-specific gene expression in K562 cells results  
156 from the sequential activity of FoxA1 and Hnf4a as predicted by the PFH. Sequential activity  
157 assumes that Hnf4a won't bind and FoxA1 won't activate, therefore neither FoxA1 nor Hnf4a  
158 should activate tissue-specific gene expression when expressed alone. To test this prediction,  
159 we induced K562 lines expressing either FoxA1 or Hnf4a alone and measured mRNA  
160 expression by RNA-seq. FoxA1 induction resulted in strong liver-specific enrichment ( $P < 10^{-4}$ ,  
161 cumulative Hypergeometric) and weak intestinal-specific enrichment (not significant) (Fig. 2A),  
162 while Hnf4a induction resulted in both strong liver-specific enrichment ( $P < 10^{-8}$ , cumulative  
163 Hypergeometric) and strong intestinal-specific enrichment ( $P < 10^{-15}$ , cumulative  
164 Hypergeometric) (Fig 2B). Importantly, neither FoxA1 nor Hnf4a are expressed within K562 cells  
165 nor did they induce expression of the other TF, suggesting that the expression changes we  
166 observed were due to the independent effects of either FoxA1 or Hnf4a.

167

168 When expressed individually, FoxA1 and Hnf4a activated largely independent sets of liver  
169 genes (Fig. 2C) and intestinal genes (Fig. 2D). FoxA1 activates liver genes enriched for  
170 fibrinolysis and complement activation (Supplementary Table 1) whereas Hnf4a activates liver  
171 genes enriched for cholesterol import and lipoprotein remodeling (Supplementary Table 2).

172 Thus, in contrast to the predictions of the PFH, FoxA1 and Hnf4a are each sufficient to induce  
173 separate and specific endodermal responses when expressed alone in K562 cells.



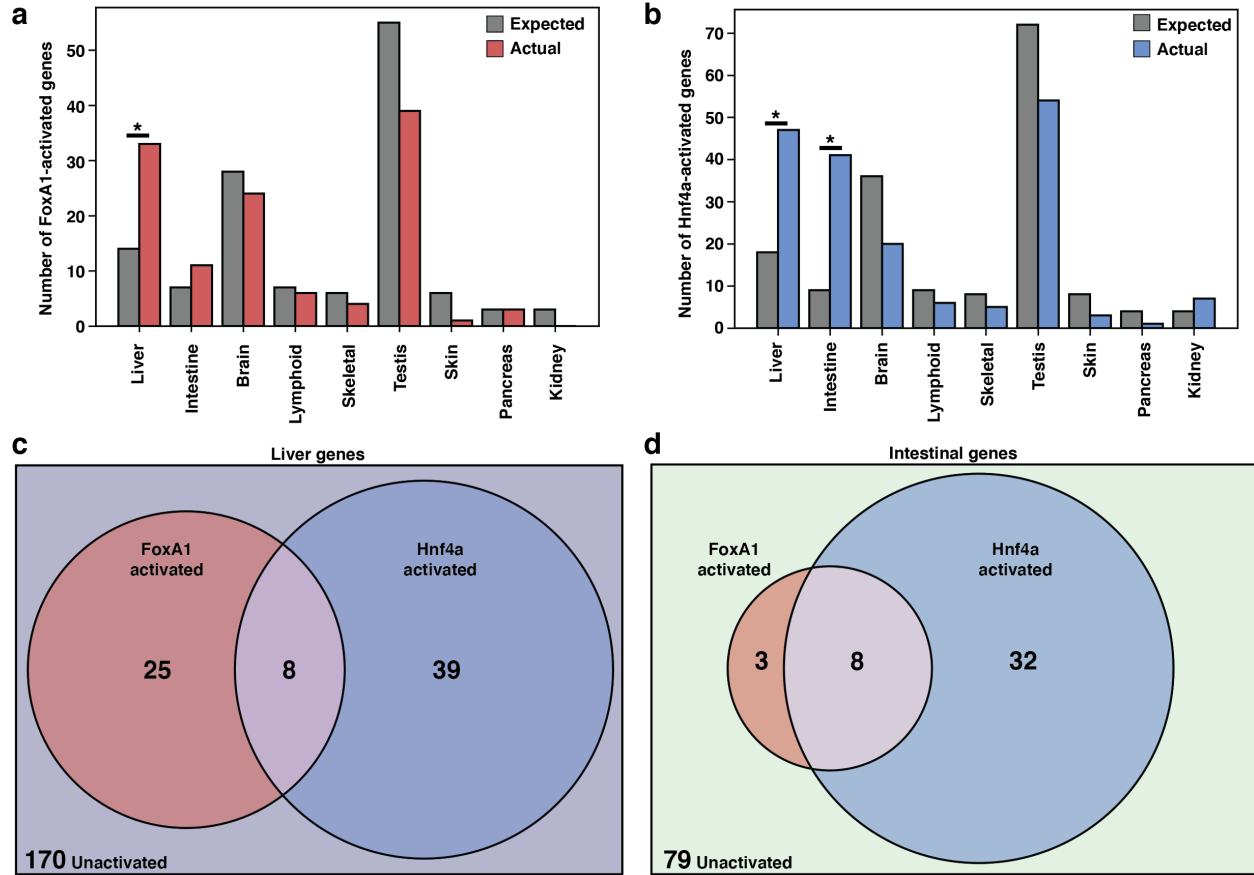

174

175

176

177

178

179

180

181

182

183

184

185

186

187

**Fig. 2: FoxA1 and Hnf4a activate independent liver- and intestine-specific genes.** (a) The number of tissue-specific genes predicted from the hypergeometric distribution to be activated by FoxA1 compared to the number actually activated. Liver-enrichment ( $P < 10^{-4}$ ) is significant. There are 242 total liver-enriched genes. (b) The number of tissue-specific genes predicted from the hypergeometric distribution to be activated by Hnf4a compared to the number actually activated. Liver- ( $P < 10^{-8}$ ) and intestine-enrichment ( $P < 10^{-15}$ ) are significant. There are 242 total liver-enriched genes and 122 total intestine-enriched genes. (c) 242 liver genes characterized as activated by Foxa1, Hnf4a, both, or neither. (d) 122 intestine genes characterized as activated by FoxA1, Hnf4a, both, or neither.

### Both FoxA1 and Hnf4a can independently bind and open inaccessible sites around liver genes

Our results raised the possibility that both FoxA1 and Hnf4a can pioneer inaccessible instances of their motifs. To test this possibility, we induced FoxA1 and Hnf4a expression individually and

188 then measured each factor's binding profile and their accessibility profiles before and after  
189 induction. FoxA1 induction resulted in FoxA1 binding and induced accessibility adjacent to *Arg1*,  
190 a liver-specific gene that is silent in K562 cells (Fig. 3A), while Hnf4a alone bound and induced  
191 accessibility at sites nearby the liver-specific gene *ApoC3* (Fig. 3B). This pattern was consistent  
192 across liver-specific loci. 34 of the 59 FoxA1 binding sites within 50 kb of a FoxA1-activated liver  
193 gene were inaccessible and opened upon induction (Fig. 3C) as was the case for 39 of the 76  
194 Hnf4a binding sites (Fig. 3D). We observed similar patterns genome-wide. FoxA1 and Hnf4a  
195 bound primarily to inaccessible sites (Supplementary Fig. 3), opened them (Supplementary Fig.  
196 3), and in regions surrounding activated genes, most binding occurred at the same sites bound  
197 in HepG2 liver cells (Supplementary Fig. 3). We conclude that FoxA1 and Hnf4a have roughly  
198 equivalent abilities to bind and open inaccessible sites.

199  
200 Because this finding was incompatible with the current formulation of the PFH, we sought to  
201 understand how we might reconsider the factors' behavior. We used FIMO (MEME Suite)<sup>29</sup> with  
202 JASPAR motif matrices (Supplementary Fig. 4)<sup>30</sup> to examine the motif content at sites bound by  
203 either FoxA1 or Hnf4a in K562 cells. Sites where FoxA1 and Hnf4a showed independent  
204 pioneering activity contained occurrences of each factor's cognate motif. Sites independently  
205 pioneered by FoxA1 contained between 1-4 motifs, while sites pioneered by Hnf4a contained 3-  
206 6 motifs (Fig. 3E). This is despite the fact that the FoxA1 motif occurs more frequently across  
207 the genome than the Hnf4a motif (Supplementary Fig. 4). This observation is consistent with  
208 data that show that FoxA1 binds with stronger affinity than Hnf4a<sup>31-33</sup> and suggests that "pioneer  
209 activity" may depend on the cis-regulatory context and not on special subclasses of TFs.

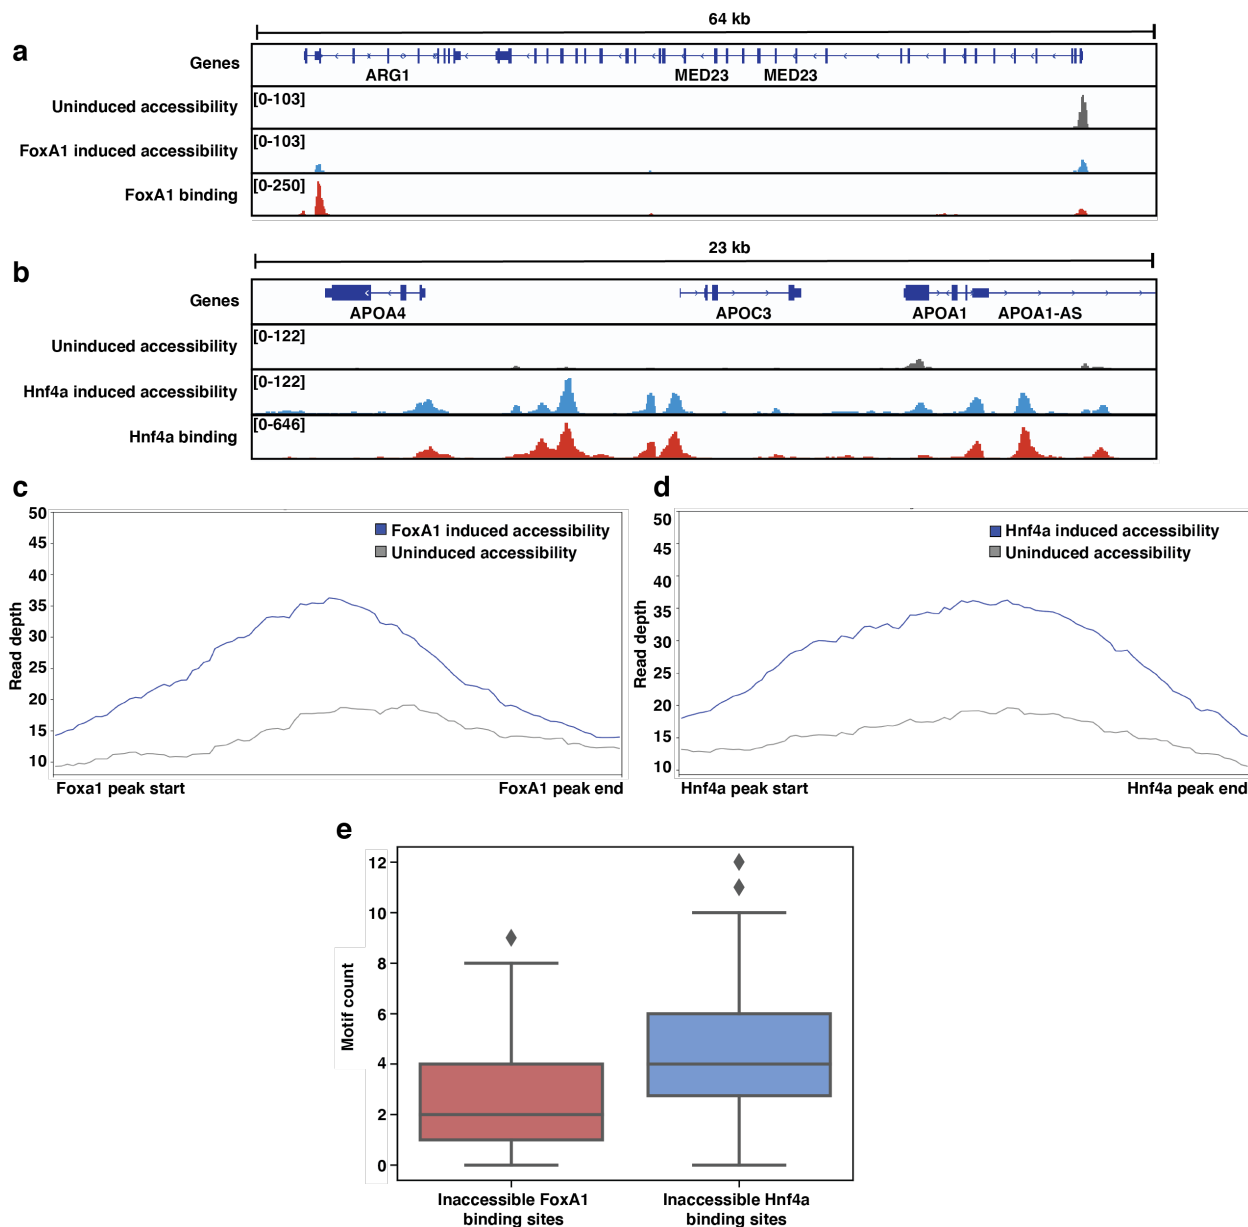

210

211

212

213

214

215

216

217

218

**Fig. 3: Both FoxA1 and Hnf4a can pioneer liver-specific loci.** (a) Genome browser view of a representative liver-specific locus (*Arg1*) in FoxA1 clonal line showing uninduced and induced accessibility and FoxA1 binding. (b) Genome browser view of a representative liver-specific locus (*ApoC3*) in Hnf4a clonal line showing uninduced and induced accessibility and Hnf4a binding. (c) Meta plot of uninduced and induced accessibility at all FoxA1 binding sites within 50 kb of each FoxA1-activated liver-specific genes (n = 59). (d) Meta plot of uninduced and induced accessibility at all Hnf4a binding sites within 50 kb of each Hnf4a-activated liver-specific genes (n = 76). (e) FoxA1 or Hnf4a motif count at FoxA1 or Hnf4a binding sites within 50 kb of each FoxA1- or Hnf4a-activated liver-specific

219 genes, respectively. Motifs were called with FIMO using  $1e-3$  a p-value threshold. For each boxplot, the  
220 center line represents the median, the box represents the first to third quartiles, and the whiskers  
221 represent any points within 1.5 times the interquartile range.

222

### 223 **Some liver genes require collaborative FoxA1-Hnf4a activity**

224 In addition to those genes independently activated by Foxa1 and Hnf4a, there is an additional  
225 set of 31 liver genes that are not activated until both FoxA1 and Hnf4a are present (Fig. 4A). We  
226 therefore asked whether the activation of these 31 liver genes conforms to the PFH. If these  
227 genes conform to the PFH, then we would expect each target to have nearby sites where FoxA1  
228 binds individually and where FoxA1 and Hnf4a co-bind when expressed together. We have  
229 called these sites “FoxA1 Pioneered” (FP). Sites are “Hnf4a Pioneered” (HP) if Hnf4a binds  
230 individually and FoxA1 and Hnf4a co-bind when expressed together and sites are  
231 “Collaboratively Co-bound” (CC) if neither TF binds individually but both do when expressed  
232 together. There are examples of each modality surrounding AMDHD1, a liver-specific gene co-  
233 activated by FoxA1 and Hnf4a (Fig. 4B). When we examine all of the liver genes only activated  
234 by FoxA1-Hnf4a co-expression, we find that in contradiction with the PFH, there are roughly  
235 equal numbers of FP, HP, and CC sites (Fig. 4C). Therefore, in most cases, genes that require  
236 joint FoxA1-Hnf4a activity do not rely on FoxA1 pioneer activity.

237

238 The patterns of genome-wide co-binding and accessibility of FoxA1 and Hnf4a follow similar  
239 trends. Of the 11,402 co-bound sites, 2,023 were FP, 3,398 were HP, and 2,192 were CC  
240 (Figure 4D) and FoxA1-induced differentially accessible peaks explain a minority of the FoxA1-  
241 Hnf4a differentially accessible peaks (Supplementary Fig. 5). Collaborative co-binding may be  
242 necessary in less accessible parts of the region, as there are more CC sites in ChromHMM-  
243 labeled <sup>34</sup> heterochromatic and repressed regions, and there are more FP and HP sites in  
244 promoter and enhancer regions (Fig. 4E).

245

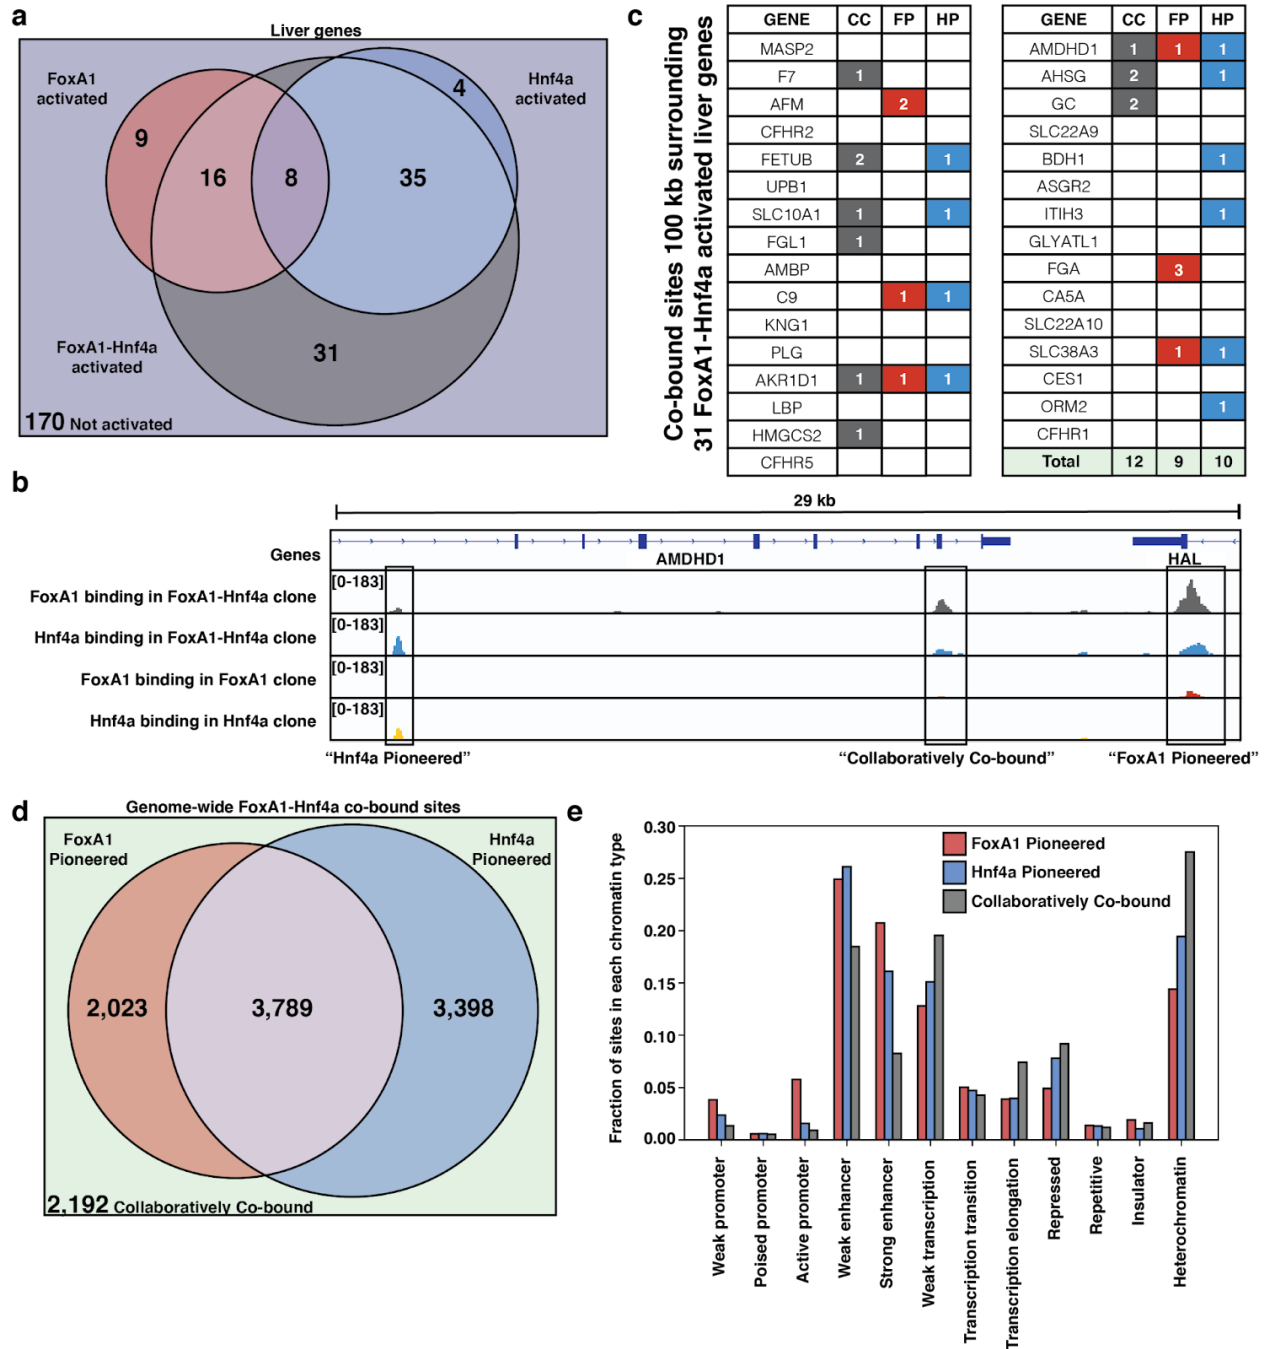

246

247 **Fig. 4: FoxA1 and Hnf4a both pioneer and collaborate at liver-specific sites.** (a) Venn diagram of all  
 248 liver genes categorized as either activated by FoxA1, Hnf4a, FoxA1-Hnf4a, some combination, or by  
 249 none of the three cocktails. (b) Genome browser view of a representative liver-specific locus (*AMDHD1*)  
 250 showing examples of a co-bound site that is “FoxA1 Pioneered” (FP), “Hnf4a Pioneered” (HP), and  
 251 “Collaboratively Co-bound” (CC). The first two tracks are FoxA1 and Hnf4a binding in the FoxA1-Hnf4a

252 co-expression clone and the last two tracks are FoxA1 and Hnf4a binding in their individual expression  
253 clones. **(c)** List of the 31 liver genes that are only activated by FoxA1-Hnf4a co-expression. The columns  
254 indicate how many co-bound FP, HP, or CC peaks exist within 100 kb of the gene. **(d)** Venn diagram of  
255 all genome-wide co-bound peaks categorized as either bound by FoxA1 individually (FP), Hnf4a  
256 individually (HP), by both, or by neither (CC). **(e)** Overlap of FP, HP, and CC sites from (D) with  
257 ChromHMM annotations showing the fraction of each co-binding site type in each chromatin region.

258

## 259 **Discussion**

260 In contrast to the predictions of the PFH, we found that both canonical PF FoxA1 and nonPF  
261 Hnf4a can independently bind nucleosome-occluded sites, increase accessibility, and activate  
262 nearby endodermal genes. Other endodermal genes require the combined activity of both  
263 factors, but the mode of action at these targets does not conform to the predicted sequential  
264 activity of FoxA1 followed by Hnf4a. These observations suggest an alternative model to the  
265 PFH during endodermal reprogramming in which FoxA1 and Hnf4a each independently activate  
266 a unique set of genes, and also collaborate, perhaps through cooperative binding, at another  
267 distinct set of targets.

268

269 Our results support efforts to revisit the independent activities of TFs in reprogramming  
270 cocktails. Early reprogramming of fibroblasts to myoblasts relied solely upon the ectopic  
271 overexpression of MyoD<sup>25,35</sup> and new reprogramming cocktails have been tested and validated in  
272 a large-scale screen for single, cell autonomous reprogramming TFs<sup>24</sup>. Increasing the efficiency  
273 of reprogramming cocktails that depend on multiple TFs will require distinguishing between the  
274 independent and cooperative effects of TFs. For example, our finding that Hnf4a independently  
275 activates more intestine-specific genes than FoxA1 raises the possibility that titrating down  
276 Hnf4a activity during reprogramming could result in a more liver-specific profile. Such fine-tuning

277 of TF activities has been suggested as an option to improve the success of other  
278 reprogramming cocktails <sup>36-38</sup>.

279

280 While we did not find evidence for a clear distinction between the functional activities of FoxA1  
281 and Hnf4a, our results do suggest that FoxA1 may require fewer copies of its motif than Hnf4a  
282 to elicit a response. This could be because FoxA1 has stronger affinity for its motif than Hnf4a.  
283 FoxA1 has a three-dimensional shape that is hypothesized to compete with histones <sup>39</sup> and the  
284 measured affinity of FoxA1 for its motif is higher than that of Hnf4a for its motif <sup>31-33</sup>. Thus,  
285 FoxA1's designation as a PF and Hnf4a as a nonPF may be due to FoxA1 having a stronger  
286 affinity for DNA than Hnf4a.

287

288 Although we found clear instances of sites independently pioneered by either FoxA1 or Hnf4a,  
289 not all sites containing multiple motifs were pioneered in K562 cells, which comports with  
290 studies showing that the sequence context in which motifs occur also plays an important role in  
291 determining whether sites will be pioneered or not. Gal4's ability to bind nucleosomal DNA  
292 templates depends both on the number of copies of its motif <sup>40</sup> and the positioning of the motif in  
293 the nucleosome <sup>41</sup>. Precise nucleosome positioning also dictates TP53 and Oct4 pioneering  
294 behavior <sup>42,43</sup>. A TF's motif affinity, motif count, and the presence of co-factor motifs are all strong  
295 predictors of pioneer activity <sup>18,19,44-48</sup> and certain types of heterochromatic patterning have been  
296 labeled "pioneer resistant" <sup>17</sup>. Pioneer activity may best be summarized then by the free energy  
297 balance between TFs, nucleosomes, and DNA <sup>49,50</sup> rather than as a property of specific classes of  
298 TFs.

299

## 300 **Methods**

### 301 **Cloning, production, and infection of viral vectors**

302 We used PCR to add V5 epitope tags to the 3' end of FoxA1 (Addgene #120438) and Hnf4a  
303 (Addgene #120450) constructs and then used HiFi DNA Assembly (NEB #E2621L) to clone  
304 each construct into a pINDUCER21 doxycycline-inducible lentiviral vector (Addgene #46948).  
305 All primers are listed in Table 1. The Hope Center Viral Vector Core at Washington University in  
306 St. Louis then generated and titered high-concentration virus. We infected human K562 cells at  
307 a multiplicity of infection of 1 by spinoculation at 800G for 30 minutes in the presence of 10  
308 µg/ml polybrene, passaged the cells for 3 days, and then selected for positively infected cells by  
309 single cell sorting on GFP+ into 96-well plates. Finally we used qPCR to select for clones that  
310 had high inducibility of TF and target gene expression (Supplementary Fig. 1).

311

### 312 **Cell culture**

313 We grew K562 cells (ATCC CCL-243) in Iscove's Modified Dulbecco Serum supplemented with  
314 10% fetal bovine serum, 1% penicillin-streptomycin and 1% non-essential amino acids. When it  
315 was time to conduct one of our functional assays, we split FoxA1-, Hnf4a-, or FoxA1-Hnf4a-  
316 expressing cells into replicate flasks and then treated with +/- 0.5 µg/ml doxycycline for 24  
317 hours.

318

### 319 **RNA extractions, reverse transcription, and qPCR**

320 We extracted RNA from 1e6 cells/sample with the PureLink RNA Mini (Invitrogen #12183020)  
321 column extraction kit and completed on-column DNA digestion with PureLink DNase (Invitrogen  
322 #12185010). We quantified and assessed the quality of the RNA with an Agilent 2200  
323 TapeStation instrument and then either froze down pure RNA for later RNA-sequencing library  
324 preparation or used ReadyScript cDNA Synthesis Mix (Sigma #RDRT-100RXN) to produce  
325 cDNA for qPCR. We performed qPCR with SYBR Green PCR Master Mix (Applied Biosystems  
326 #4301955) and gene-specific and housekeeping primers (Table 1).



327

### 328 **RNA-sequencing and analysis**

329 We generated three replicates of +/- doxycycline-treated RNA-sequencing libraries with the  
330 NEBNext Ultra II Directional RNA Library Prep Kit (NEB #E7765S). We quantified and assessed  
331 the quality of the libraries with an Agilent 2200 TapeStation instrument, size selected with  
332 AMPure XP beads (Beckman Coulter #A63880), and then sequenced the libraries with 75bp  
333 paired-end reads on an Illumina NextSeq 500 instrument.

334

335 We quantified transcripts with Salmon <sup>51</sup>, filtered out any with fewer than 10 reads, and then  
336 called differentially expressed transcripts with DeSeq2 <sup>52</sup>. A gene was called differentially  
337 upregulated if it had a log2fold change of at least 1 and was called “activated” if it had fewer  
338 than 50 normalized reads in the uninduced control. A gene was called “tissue-specific”  
339 according to the Human Protein Atlas definition of tissue enrichment <sup>53</sup>, which is if a gene is at  
340 least 4-fold higher expressed in the tissue-of-interest than in any other tissue.

341

### 342 **ATAC-sequencing and analysis**

343 We followed the OMNI-Atac protocol <sup>54</sup> to generate two replicates of +/- doxycycline-treated low-  
344 background ATAC-sequencing libraries. We isolated 2e5 cells/sample and then extracted 5e4  
345 nuclei/sample for tagmentation and library preparation. We quantified and assessed the quality  
346 of the libraries with an Agilent 2200 TapeStation instrument, size selected with AMPure XP  
347 beads, and then sequenced the libraries with 75bp paired-end reads on an Illumina NextSeq  
348 500 instrument.

349

350 We aligned transcripts with bowtie2 <sup>55</sup> with the parameters: --local -X2000, generated RPKM  
351 normalized BigWig files for visualization with DeepTools bamCoverage <sup>56</sup>, and then called peaks

352 at low stringency with macs2 ( $p = 0.01$ )<sup>57</sup>. With these peaks, we either called reproducible peaks  
353 with IDR (FDR of 0.05)<sup>58</sup> or used DiffBind<sup>59</sup> to call differential peaks.

354

### 355 **CUT&Tag and analysis**

356 We followed the CUTANA Direct-to-PCR CUT&Tag protocol (EpiCypher) to generate two  
357 replicates of low-background CUT&Tag libraries. We isolated 1e5 cells/sample, and then either  
358 used rabbit anti-human FoxA1 monoclonal antibody (Cell Signaling #53528), mouse anti-human  
359 Hnf4a monoclonal antibody (Invitrogen #MA1-199), or rabbit anti-human histone H3K4me3  
360 polyclonal antibody (Epicypther #13-0041) as a positive control. We amplified this signal with  
361 either goat anti-rabbit (Epicypther #13-0047) or goat anti-mouse (Epicypther #13-0048)  
362 polyclonal secondary antibodies. For a negative control, we omitted the primary antibody and  
363 checked for any non-specific pull-down. Finally, we used CUTANA pAG-Tn5 (Epicypther #15-  
364 1017) to tagment the genomic regions surrounding each bound antibody complex. We  
365 quantified and assessed the quality of the libraries with an Agilent 2200 TapeStation instrument,  
366 size selected with AMPure XP beads, and then sequenced the libraries with 150bp paired-end  
367 reads on an Illumina NextSeq 500 instrument.

368

369 When we assessed our libraries with the Agilent TapeStation instrument, we found that our  
370 negative controls had minimal signal. This is expected in the protocol and as such sequencing  
371 the sample is recommended as optional<sup>60</sup>. For this reason, we sequenced only our positive  
372 samples. We aligned our samples with Bowtie2<sup>55</sup> using recommended parameters<sup>60</sup>: --very-  
373 sensitive --end-to-end --no-mixed --no-discordant -l 10 -X700, created RPKM normalized  
374 BigWig files with DeepTools bamCoverage<sup>56</sup>, and called peaks with macs2 ( $p = 1e-5$ )<sup>57</sup> with  
375 recommended parameters<sup>26</sup>. We then combined overlapping peaks from replicate samples  
376 using BEDTools intersect<sup>61</sup>. We attributed binding sites to genes if they were within 50 kb (25 kb

377 up- and 25 kb downstream) of the gene's TSS. Because co-binding occurred less frequently, we  
378 attributed co-binding sites to genes if they were within 100 kb of the gene's TSS. "FoxA1  
379 Pioneered" sites were those where we identified overlapping FoxA1 and Hnf4a binding peaks  
380 within 100 kb of a gene that was only activated by FoxA1 and Hnf4a and where there was also  
381 an overlapping FoxA1 binding peak, when FoxA1 was expressed alone. "Hnf4a Pioneered" sites  
382 were those where we identified overlapping FoxA1 and Hnf4a binding peaks within 100 kb of a  
383 gene that was only activated by FoxA1 and Hnf4a and where there was also an overlapping Hnf4a  
384 binding peak, when Hnf4a was expressed alone. And "Collaboratively Co-bound" sites were  
385 those where we identified overlapping FoxA1 and Hnf4a binding peaks within 100 kb of a gene  
386 that was only activated by FoxA1 and Hnf4a and where there was neither a FoxA1 nor Hnf4a  
387 binding peak.

388

### 389 **Tissue- and biological process-specific expression analysis**

390 We generated lists of tissue-specific genes for each tissue by extracting "enriched genes" from  
391 the Human Protein Atlas. A tissue's enriched genes are those whose mRNA expression is at  
392 least four-fold higher than expression found in any other tissue. We then computed  
393 hypergeometric assays to determine if our activated genes were enriched in any tissue-specific  
394 gene set. Finally, we used Panther gene ontology analysis to identify enriched biological  
395 processes.

396

### 397 **Genome tracks and profile plot analysis**

398 We visualized the signal from our functional assays by loading each file into the Integrated  
399 Genome Viewer <sup>62</sup>, using hg19 as reference. We then used the computeMatrix function in  
400 reference-point mode and plotProfile function, both with default parameters, in the DeepTools

401 suite <sup>56</sup> to display aggregated CUT&Tag and ATAC-seq signals across indicated  
402 genomic regions.

403

#### 404 **Motif and chromatin segmentation analysis**

405 We used FIMO from the MEME Suite to identify occurrences of motifs. We used 1e-3 as a p-  
406 value threshold and JASPAR PWMs for FoxA1 (MA0148.1) and Hnf4a (MA0114.2). We used  
407 ChromHMM annotations <sup>34</sup> to characterize the epigenetic profile of FoxA1 and Hnf4a binding  
408 sites.

409

#### 410 **Data Availability**

411 All genomic sequencing data have been deposited on Gene Expression Omnibus (GEO) under  
412 accession number GSE182191.

413

#### 414 **Acknowledgements**

415 We thank Dr. Gary Stormo, Dr. Robi Mitra, and members of the Cohen Lab for reading and  
416 critiquing the manuscript and for helpful discussion; Jessica Hoisington-Lopez and MariaLynn  
417 Crosby in the DNA Sequencing Innovation Lab for assistance with high-throughput sequencing;  
418 the Genome Engineering and iPSC Center for allowing us to use their Sony Flow Cytometer for  
419 cell sorting; and Mingjie Li in the Hope Center Viral Vectors Core for assistance with producing  
420 lentiviral expression vectors. This work was supported by grants from the National Institutes of  
421 Health: R01GM092910 (Dr. Barak Cohen), T32HG000045 (Dr. Michael Brent, Washington  
422 University in St. Louis Genome Analysis Training Program), and T32GM007200 (Dr. Wayne  
423 Yokoyama, Washington University in St. Louis Medical Scientist Training Program).

424

#### 425 **Author Contributions**

426 J.L.H. and B.A.C. designed the overall project. J.L.H. conducted all experiments and analysis.

427 J.L.H. and B.A.C. wrote the manuscript.

428

## 429 **Competing Interests**

430 The authors declare no competing interests.

431

## 432 **References**

433 1. Kornberg, R. D. Chromatin structure: a repeating unit of histones and DNA. *Science* **184**, 868–

434 871 (1974).

435 2. Kaplan, N. *et al.* The DNA-encoded nucleosome organization of a eukaryotic genome. *Nature*

436 **458**, 362–366 (2009).

437 3. McPherson, C. E., Shim, E. Y., Friedman, D. S. & Zaret, K. S. An active tissue-specific

438 enhancer and bound transcription factors existing in a precisely positioned nucleosomal array.

439 *Cell* **75**, 387–398 (1993).

440 4. Shim, E. Y., Woodcock, C. & Zaret, K. S. Nucleosome positioning by the winged helix

441 transcription factor HNF3. *Genes Dev.* **12**, 5–10 (1998).

442 5. Cirillo, L. A. *et al.* Binding of the winged-helix transcription factor HNF3 to a linker histone site on

443 the nucleosome. *EMBO J.* **17**, 244–254 (1998).

444 6. Cirillo, L. A. *et al.* Opening of compacted chromatin by early developmental transcription factors

445 HNF3 (FoxA) and GATA-4. *Mol. Cell* **9**, 279–289 (2002).

446 7. Iwafuchi-Doi, M. & Zaret, K. S. Pioneer transcription factors in cell reprogramming. *Genes Dev.*

447 **28**, 2679–2692 (2014).

448 8. Wapinski, O. L. *et al.* Hierarchical mechanisms for direct reprogramming of fibroblasts to

449 neurons. *Cell* **155**, 621–635 (2013).

- 450 9. Matsuda, T. *et al.* Pioneer Factor NeuroD1 Rearranges Transcriptional and Epigenetic Profiles  
451 to Execute Microglia-Neuron Conversion. *Neuron* (2018) doi:10.1016/j.neuron.2018.12.010.
- 452 10. Soufi, A. *et al.* Pioneer transcription factors target partial DNA motifs on nucleosomes to initiate  
453 reprogramming. *Cell* **161**, 555–568 (2015).
- 454 11. Soufi, A., Donahue, G. & Zaret, K. S. Facilitators and impediments of the pluripotency  
455 reprogramming factors' initial engagement with the genome. *Cell* **151**, 994–1004 (2012).
- 456 12. Sekiya, S. & Suzuki, A. Direct conversion of mouse fibroblasts to hepatocyte-like cells by  
457 defined factors. *Nature* **475**, 390–393 (2011).
- 458 13. Morris, S. A. *et al.* Dissecting engineered cell types and enhancing cell fate conversion via  
459 CellNet. *Cell* **158**, 889–902 (2014).
- 460 14. Karagianni, P., Moulos, P., Schmidt, D., Odom, D. T. & Talianidis, I. Bookmarking by Non-  
461 pioneer Transcription Factors during Liver Development Establishes Competence for Future  
462 Gene Activation. *Cell Rep.* **30**, 1319–1328.e6 (2020).
- 463 15. Horisawa, K. *et al.* The Dynamics of Transcriptional Activation by Hepatic Reprogramming  
464 Factors. *Mol. Cell* **79**, 660–676.e8 (2020).
- 465 16. Barozzi, I. *et al.* Coregulation of transcription factor binding and nucleosome occupancy through  
466 DNA features of mammalian enhancers. *Mol. Cell* **54**, 844–857 (2014).
- 467 17. Mayran, A. *et al.* Pioneer factor Pax7 deploys a stable enhancer repertoire for specification of  
468 cell fate. *Nat. Genet.* **50**, 259–269 (2018).
- 469 18. Donaghey, J. *et al.* Genetic determinants and epigenetic effects of pioneer-factor occupancy.  
470 *Nat. Genet.* **50**, 250–258 (2018).
- 471 19. Manandhar, D. *et al.* Incomplete MyoD-induced transdifferentiation is associated with chromatin  
472 remodeling deficiencies. *Nucleic Acids Res.* **45**, 11684–11699 (2017).
- 473 20. Zaret, K. S. & Mango, S. E. Pioneer transcription factors, chromatin dynamics, and cell fate  
474 control. *Curr. Opin. Genet. Dev.* **37**, 76–81 (2016).

- 475 21. Swinstead, E. E. *et al.* Steroid Receptors Reprogram FoxA1 Occupancy through Dynamic  
476 Chromatin Transitions. *Cell* **165**, 593–605 (2016).
- 477 22. Miller, J. A. & Widom, J. Collaborative competition mechanism for gene activation in vivo. *Mol.*  
478 *Cell. Biol.* **23**, 1623–1632 (2003).
- 479 23. Meerbrey, K. L. *et al.* The pINDUCER lentiviral toolkit for inducible RNA interference in vitro and  
480 in vivo. *Proc. Natl. Acad. Sci. U. S. A.* **108**, 3665–3670 (2011).
- 481 24. Ng, A. H. M. *et al.* A comprehensive library of human transcription factors for cell fate  
482 engineering. *Nat. Biotechnol.* **39**, 510–519 (2021).
- 483 25. Davis, R. L., Weintraub, H. & Lassar, A. B. Expression of a single transfected cDNA converts  
484 fibroblasts to myoblasts. *Cell* **51**, 987–1000 (1987).
- 485 26. Kaya-Okur, H. S. *et al.* CUT&Tag for efficient epigenomic profiling of small samples and single  
486 cells. *Nat. Commun.* **10**, 1930 (2019).
- 487 27. Buenrostro, J. D., Wu, B., Chang, H. Y. & Greenleaf, W. J. ATAC-seq: A Method for Assaying  
488 Chromatin Accessibility Genome-Wide. *Curr. Protoc. Mol. Biol.* **109**, 21.29.1–9 (2015).
- 489 28. Partridge, E. C. *et al.* Occupancy maps of 208 chromatin-associated proteins in one human cell  
490 type. *Nature* **583**, 720–728 (2020).
- 491 29. Grant, C. E., Bailey, T. L. & Noble, W. S. FIMO: scanning for occurrences of a given motif.  
492 *Bioinformatics* **27**, 1017–1018 (2011).
- 493 30. Fornes, O. *et al.* JASPAR 2020: update of the open-access database of transcription factor  
494 binding profiles. *Nucleic Acids Res.* **48**, D87–D92 (2020).
- 495 31. Garcia, M. F. *et al.* Structural Features of Transcription Factors Associating with Nucleosome  
496 Binding. *Molecular Cell* (2019) doi:10.1016/j.molcel.2019.06.009.
- 497 32. Rufibach, L. E., Duncan, S. A., Battle, M. & Deeb, S. S. Transcriptional regulation of the human  
498 hepatic lipase (LIPC) gene promoter. *J. Lipid Res.* **47**, 1463–1477 (2006).
- 499 33. Jiang, G., Lee, U. & Sladek, F. M. Proposed mechanism for the stabilization of nuclear receptor  
500 DNA binding via protein dimerization. *Mol. Cell. Biol.* **17**, 6546–6554 (1997).

- 501 34. Ernst, J. & Kellis, M. ChromHMM: automating chromatin-state discovery and characterization.  
502 *Nat. Methods* **9**, 215 (2012).
- 503 35. Choi, J. *et al.* MyoD converts primary dermal fibroblasts, chondroblasts, smooth muscle, and  
504 retinal pigmented epithelial cells into striated mononucleated myoblasts and multinucleated  
505 myotubes. *Proceedings of the National Academy of Sciences* **87**, 7988–7992 (1990).
- 506 36. Ma, H., Wang, L., Yin, C., Liu, J. & Qian, L. In vivo cardiac reprogramming using an optimal  
507 single polycistronic construct. *Cardiovasc. Res.* **108**, 217–219 (2015).
- 508 37. Wang, L. *et al.* Stoichiometry of Gata4, Mef2c, and Tbx5 influences the efficiency and quality of  
509 induced cardiac myocyte reprogramming. *Circ. Res.* **116**, 237–244 (2015).
- 510 38. Vaseghi, H. R. *et al.* Generation of an inducible fibroblast cell line for studying direct cardiac  
511 reprogramming. *Genesis* **54**, 398–406 (2016).
- 512 39. Clark, K. L., Halay, E. D., Lai, E. & Burley, S. K. Co-crystal structure of the HNF-3/fork head  
513 DNA-recognition motif resembles histone H5. *Nature* **364**, 412–420 (1993).
- 514 40. Workman, J. L., Schuetz, T. J. & Kingston, R. E. Facilitated binding of GAL4 and heat shock  
515 factor to nucleosomal templates: differential function of DNA-binding domains. *Genes* (1991).
- 516 41. Vettese-Dadey, M., Walter, P., Chen, H., Juan, L. J. & Workman, J. L. Role of the histone amino  
517 termini in facilitated binding of a transcription factor, GAL4-AH, to nucleosome cores. *Mol. Cell.*  
518 *Biol.* **14**, 970–981 (1994).
- 519 42. Yu, X. & Buck, M. J. Defining TP53 pioneering capabilities with competitive nucleosome binding  
520 assays. *Genome Res.* **29**, 107–115 (2019).
- 521 43. Huertas, J., MacCarthy, C. M., Schöler, H. R. & Cojocar, V. Nucleosomal DNA Dynamics  
522 Mediate Oct4 Pioneer Factor Binding. *Biophys. J.* (2020) doi:10.1016/j.bpj.2019.12.038.
- 523 44. Yan, C., Chen, H. & Bai, L. Systematic Study of Nucleosome-Displacing Factors in Budding  
524 Yeast. *Mol. Cell* **71**, 294–305.e4 (2018).



- 525 45. Heinz, S. *et al.* Simple combinations of lineage-determining transcription factors prime cis-  
526 regulatory elements required for macrophage and B cell identities. *Mol. Cell* **38**, 576–589  
527 (2010).
- 528 46. Boyes, J. & Felsenfeld, G. Tissue-specific factors additively increase the probability of the all-or-  
529 none formation of a hypersensitive site. *EMBO J.* **15**, 2496–2507 (1996).
- 530 47. Minderjahn, J. *et al.* Mechanisms governing the pioneering and redistribution capabilities of the  
531 non-classical pioneer PU.1. *Nat. Commun.* **11**, 402 (2020).
- 532 48. Meers, M. P., Janssens, D. H. & Henikoff, S. Pioneer Factor-Nucleosome Binding Events during  
533 Differentiation Are Motif Encoded. *Mol. Cell* (2019) doi:10.1016/j.molcel.2019.05.025.
- 534 49. Polach, K. J. & Widom, J. A model for the cooperative binding of eukaryotic regulatory proteins  
535 to nucleosomal target sites. *J. Mol. Biol.* **258**, 800–812 (1996).
- 536 50. Mirny, L. A. Nucleosome-mediated cooperativity between transcription factors. *Proc. Natl. Acad.*  
537 *Sci. U. S. A.* **107**, 22534–22539 (2010).
- 538 51. Patro, R., Duggal, G., Love, M. I., Irizarry, R. A. & Kingsford, C. Salmon provides fast and bias-  
539 aware quantification of transcript expression. *Nat. Methods* **14**, 417–419 (2017).
- 540 52. Love, M. I., Huber, W. & Anders, S. Moderated estimation of fold change and dispersion for  
541 RNA-seq data with DESeq2. *Genome Biol.* **15**, 550 (2014).
- 542 53. Uhlén, M. *et al.* Proteomics. Tissue-based map of the human proteome. *Science* **347**, 1260419  
543 (2015).
- 544 54. Ryan Corces, M. *et al.* An improved ATAC-seq protocol reduces background and enables  
545 interrogation of frozen tissues. *Nat. Methods* **14**, 959–962 (2017).
- 546 55. Langmead, B. & Salzberg, S. L. Fast gapped-read alignment with Bowtie 2. *Nat. Methods* **9**,  
547 357–359 (2012).
- 548 56. Ramírez, F. *et al.* deepTools2: a next generation web server for deep-sequencing data analysis.  
549 *Nucleic Acids Res.* **44**, W160–5 (2016).
- 550 57. Zhang, Y. *et al.* Model-based Analysis of ChIP-Seq (MACS). *Genome Biol.* **9**, 1–9 (2008).

- 551 58. Li, Q., Brown, J. B., Huang, H. & Bickel, P. J. Measuring reproducibility of high-throughput  
552 experiments. *aoas* **5**, 1752–1779 (2011).
- 553 59. Stark, R., Brown, G. & Others. DiffBind: differential binding analysis of ChIP-Seq peak data. *R*  
554 *package version* **100**, (2011).
- 555 60. Kaya-Okur, H. S., Janssens, D. H., Henikoff, J. G., Ahmad, K. & Henikoff, S. Efficient low-cost  
556 chromatin profiling with CUT&Tag. *Nat. Protoc.* **15**, 3264–3283 (2020).
- 557 61. Quinlan, A. R. & Hall, I. M. BEDTools: a flexible suite of utilities for comparing genomic features.  
558 *Bioinformatics* **26**, 841–842 (2010).
- 559 62. Robinson, J. T. *et al.* Integrative genomics viewer. *Nat. Biotechnol.* **29**, 24–26 (2011).
